# Supplementary material for: Inhibition of lysine acetyltransferases impairs tumor angiogenesis acting on both endothelial and tumor cells
Source: J Exp Clin Cancer Res. 2020 Jun 5;39:103. doi: 10.1186/s13046-020-01604-z (PMC7273677; doi:10.1186/s13046-020-01604-z)
Supplement: Supplementary file 2 — Additional file 2. [file 13046_2020_1604_MOESM2_ESM.pdf]

## Supplementary Materials

### Antibodies

Primary antibodies used for immunofluorescence and immunoblot experiments

| Antigen                    | Company                                       | Clone   |
|----------------------------|-----------------------------------------------|---------|
| CD31                       | Dianova GmbH, Warburgstr., Hamburg, Germany   | SZ31    |
| Acetyl- $\alpha$ -tubulin  | Sigma-Aldrich, St. Louis, MO                  | 6-11B-1 |
| Tyrosyl- $\alpha$ -tubulin | Sigma-Aldrich, St. Louis, MO                  | YL1/2   |
| vinculin                   | Santa Cruz                                    | 7F9     |
| acetylated histone H3      | Millipore, Billerica, MA, USA                 | 6.6.2   |
| acetyl-H3 (K9)             | Cell Signaling, Freiburg, Germany             | C5B11   |
| acetyl-H3 (K27)            | Cell Signaling, Freiburg, Germany             | D5E4    |
| acetyl-H3 (K56)            | Cell Signaling, Freiburg, Germany             | 4243    |
| acetyl-H4 (K16)            | Cell Signaling, Freiburg, Germany             | E2B8W   |
| total H4                   | Cell Signaling, Freiburg, Germany             | D2X4V   |
| $\alpha$ -tubulin          | Santa Cruz Biotechnology, Santa Cruz, CA, USA | DM1A    |
| $\beta$ -actin             | Sigma-Aldrich, St. Louis, MO                  | AC15    |

Anti-mouse or anti-rabbit immunoglobulin G (IgG)-Secondary antibodies conjugated with horseradish peroxidase were purchased by Cell Signaling, Freiburg, Germany

### Whole-mount *in situ* hybridization

Whole mount *in situ* hybridization was performed as previously described [1] with few modifications. Antisense RNA probe for myocardium-specific marker *cmIc2* (*myl7*, myosin light chain 7), cloned in pGEM-T easy vector, was transcribed *in vitro* using Sp6 RNA polymerase and digoxigenin (DIG) RNA labeling Mix (Roche Diagnostics Mannheim, Germany). Zebrafish embryos at 48 hpf were fixed with 4% PFA dehydrated with methanol/PBST series digested with proteinase K (Sigma) solution and incubated first in hybridization buffer containing 300 ng/ml DIG-labeled antisense RNA probes at 68 °C ON and then with anti-DIG Fab fragment conjugated with alkaline phosphatase (1:2000, Roche Diagnostics) followed by exposure to BM purple solution (Roche Diagnostics) and monitored closely for staining progression. Images were acquired using a stereomicroscope Nikon SMZ1500. The “looping angle”, defined as the angle created between the plane of the cardiac atrioventricular junction and the embryo anteroposterior axis [2], was quantified using ImageJ software.

### Zebrafish larvae locomotor activity

After the exposure to CPTH6 starting from 6 hpf, Casper embryos at 120 hpf were tracked for 30 min in a 96-well plate by DanioVision automated device (Noldus, Wageningen, Netherlands) and analyzed by Ethovision software (Noldus).

### **Supplementary references**

- [1] M. Andreazzoli, V. Broccoli, and I. B. Dawid, Cloning and expression of *noz1*, a zebrafish zinc finger gene related to *drosophila* *nocA*, *Mech. Dev.* 104 (2001) 117-120.
  
- [2] Y. Chernyavskaya, A. M. Ebert, E. Milligan, and D. M. Garrity, Voltage-gated calcium channel *CACNB2* (*beta2.1*) protein is required in the heart for control of cell proliferation and heart tube integrity, *Dev. Dyn.* 241 (2012) 648-662.
